# Supplementary material for: A graphene wrapped hair-derived carbon/sulfur composite for lithium–sulfur batteries
Source: Royal Society of Chemistry journal article supplement (doi:10.1039/c5ta00651a), 2015-01-01
Supplement: c5ta00651a1.pdf [file c5ta00651a1.pdf]

Supporting Information for

## Graphene-wrapped hair-derived carbon/sulfur composite for high performance lithium sulfur batteries

Mingpeng Yu,<sup>a</sup> Rui Li,<sup>a</sup> Yue Tong,<sup>a</sup> Yingru Li,<sup>a</sup> Chun Li,<sup>a</sup> Jong-Dal Hong,<sup>b</sup> and Gaoquan Shi<sup>\*a</sup>

<sup>a</sup>Department of Chemistry, Tsinghua University, Beijing 100084, People's Republic of China. Fax: 86 62771149; Tel: 86 6277 3743; E-mail: gshi@tsinghua.edu.cn

<sup>b</sup>Department of Chemistry, Incheon National University, 406-772 Incheon, South Korea

**Table S1** Summary of the initial and final discharge capacities, as well as the capacity retentions of g-C/S electrode; the capacity retentions were calculated on account of the final and maximum discharge capacities measured at each discharge rate.

| Rate (C) | Initial capacity (mA h g <sup>-1</sup> ) | Capacity after 300 cycles (mA h g <sup>-1</sup> ) | Capacity retention (%) |
|----------|------------------------------------------|---------------------------------------------------|------------------------|
| 0.2      | 1113.2                                   | 989.2                                             | 88.8                   |
| 0.5      | 1066.1                                   | 870.3                                             | 81.6                   |
| 1.0      | 737.8                                    | 705.3                                             | 86.9                   |
| 2.0      | 606.7                                    | 574.2                                             | 80.2                   |

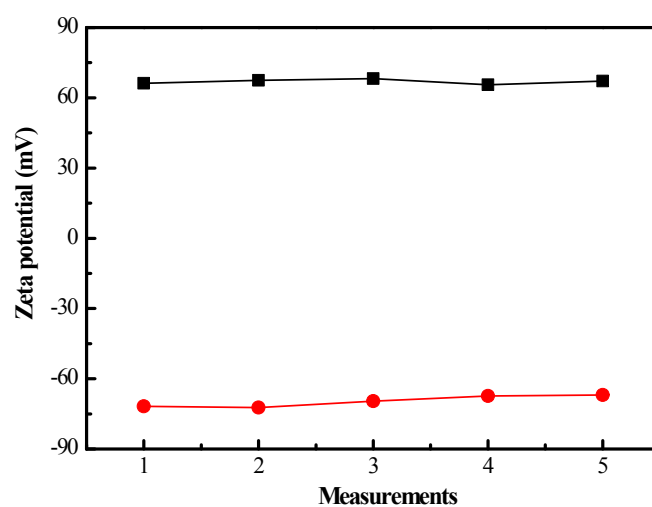

**Fig. S1** Zeta potentials of the aqueous suspensions (pH ~ 5.3) of CTAB modified C/S composite (black) and graphene oxide (red); the interval of each measurement is 1.0 min.

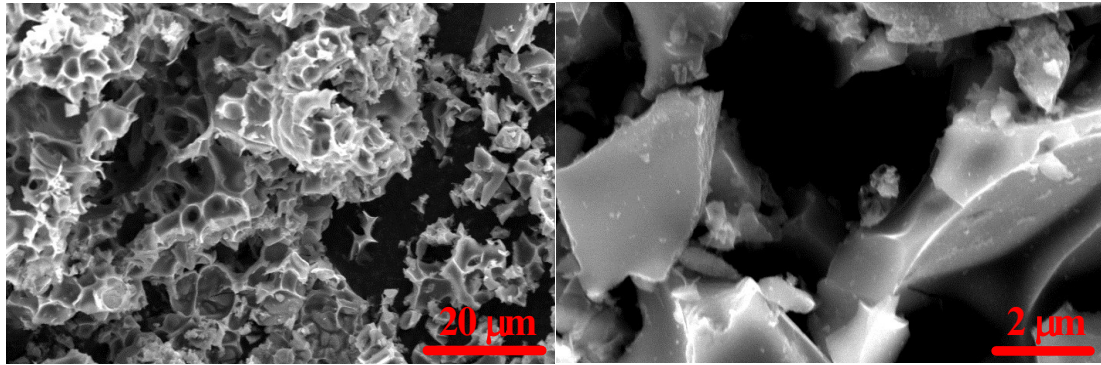

**Fig. S2** SEM images of the activated carbon material prepared from hair.

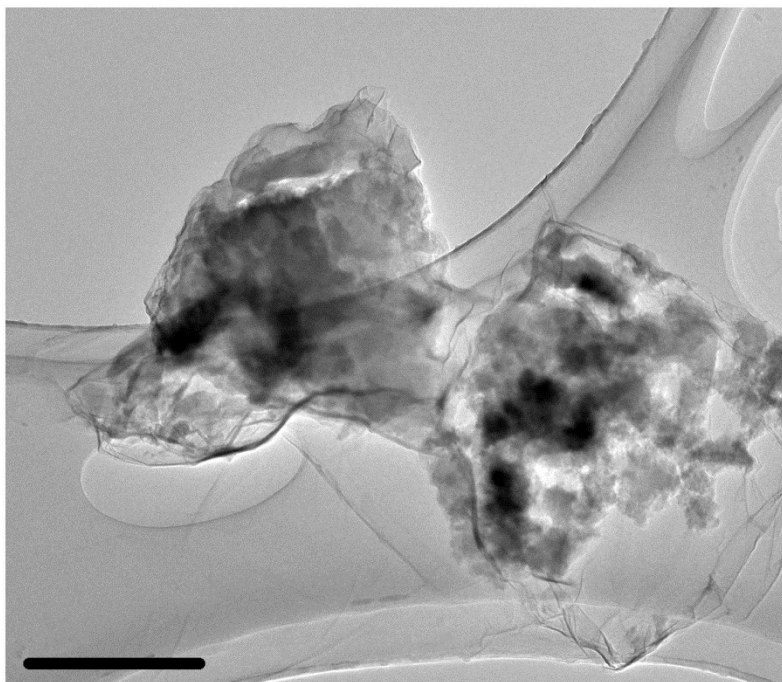

**Fig. S3** STEM image of rGO wrapped C/S composite. Scale bar, 500 nm.

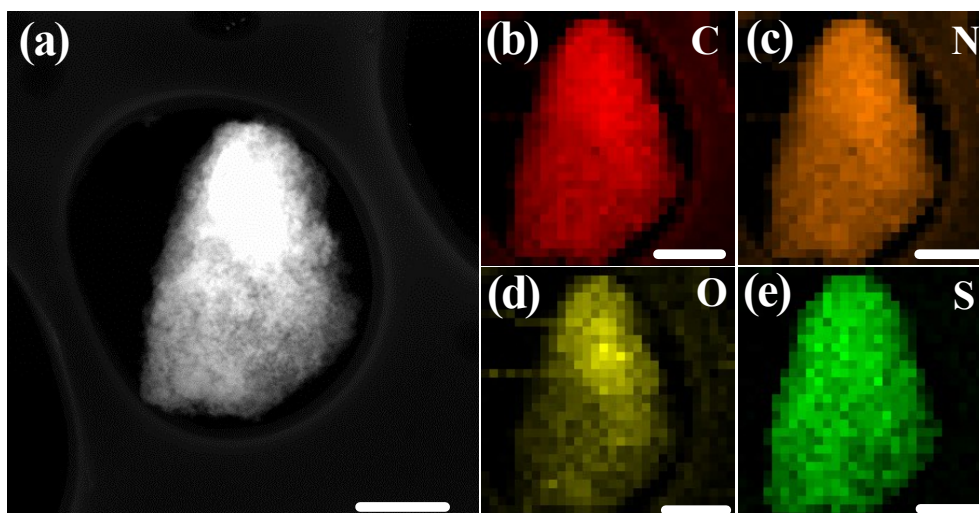

**Fig. S4** (a) STEM images of C/S composite and the corresponding elemental mapping images of (b) carbon, (c) nitrogen, (d) oxygen and (e) sulfur. Scale bars, 500 nm.

Fig. S4 shows the *STEM* and the corresponding elemental mapping images of C/S composite. Accordingly, the C/S aggregates are composed of tiny particles because of the ball milling treatment, and they have homogeneous distributions of carbon, oxygen, nitrogen, and sulfur elements

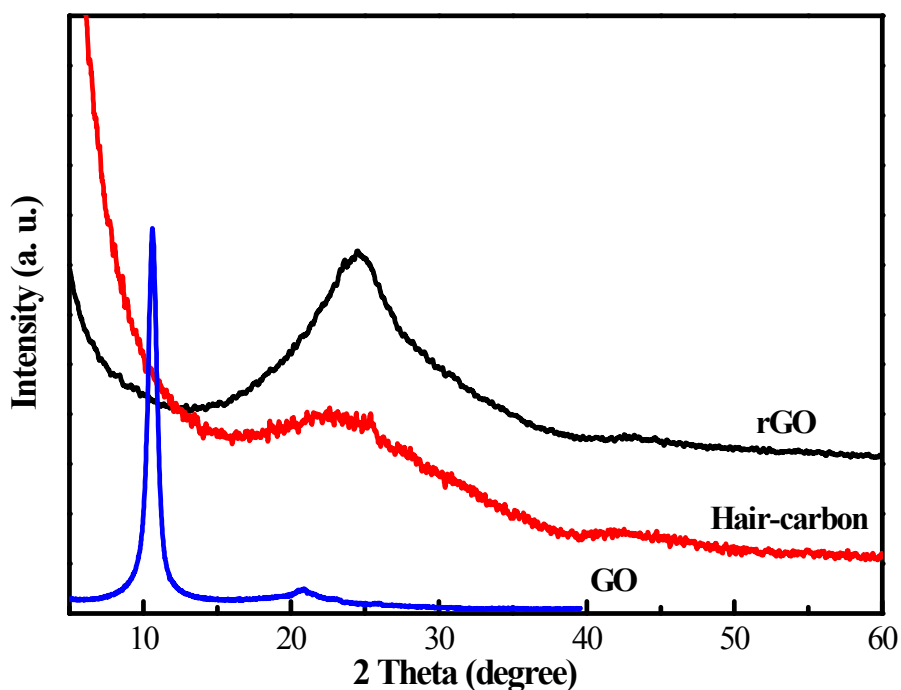

**Fig. S5** XRD patterns of GO, rGO sheets and as-prepared hair carbon.

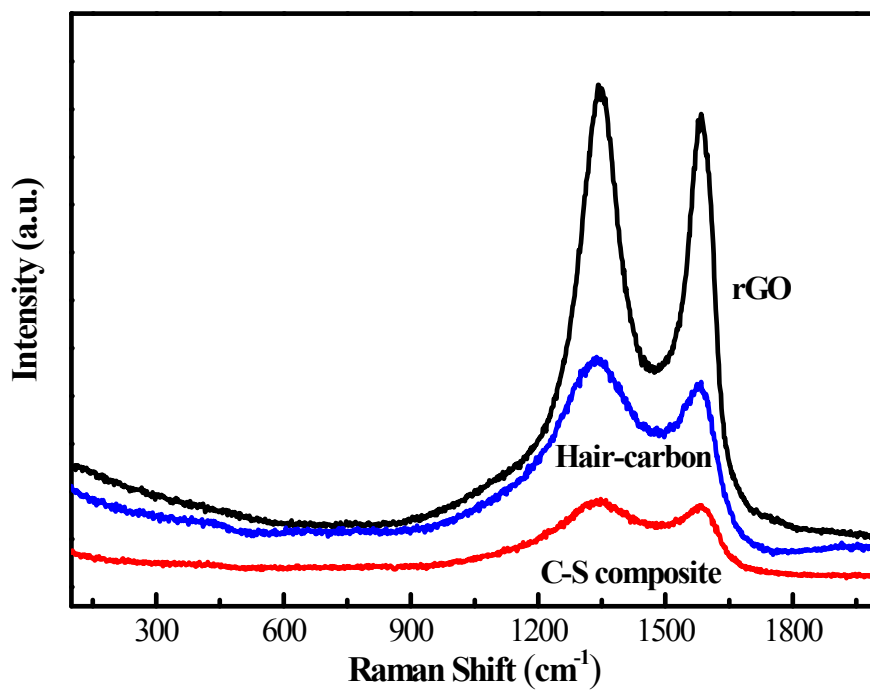

**Fig. S6** Raman spectra of the rGO sheets, as-prepared hair carbon, and C/S composite.

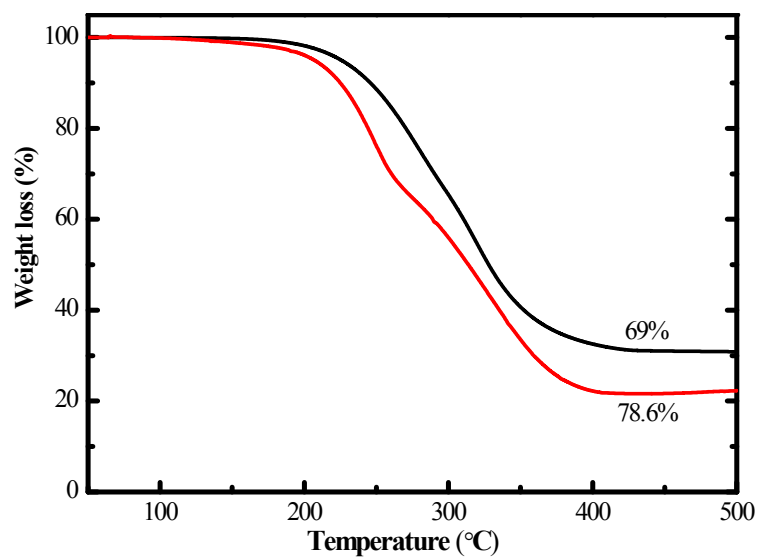

**Fig. S7** TGA curves of C/S (red) and g-G/S (black) composites.

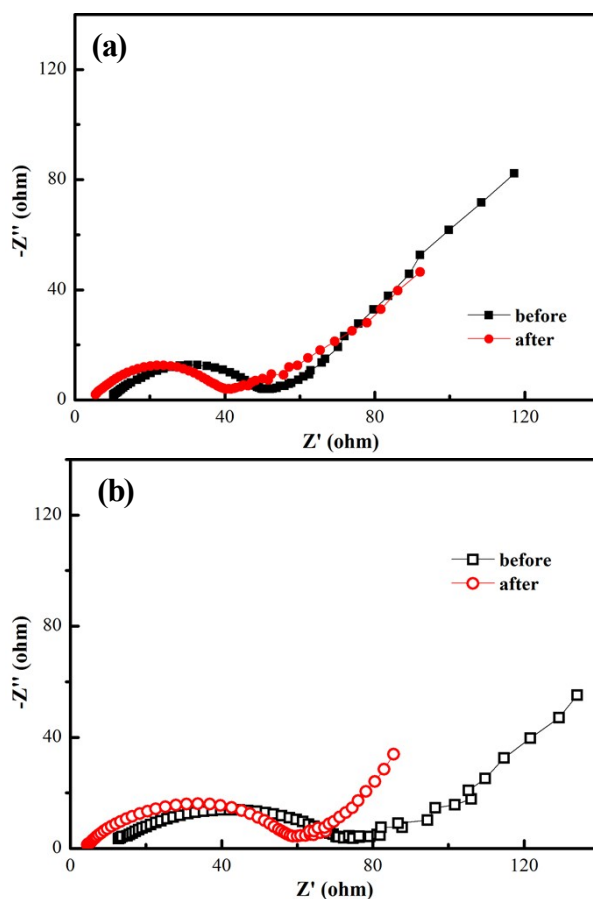

**Fig. S8** Electrochemical impedance spectra of (a) g-C/S and (b) C/S electrodes before and after cycling.

The impedance spectrum of g-C/S composite electrode shows a much smaller high-frequency semicircle than that of the C/S composite electrode. Since the depressed semicircle in high frequency region is related to the contact resistance and charge transfer resistance, a smaller semicircle of g-C/S composite indicates its more efficient charge transfer process between C/S particles, attributing to the enhanced conductivity of the graphene wrapping.

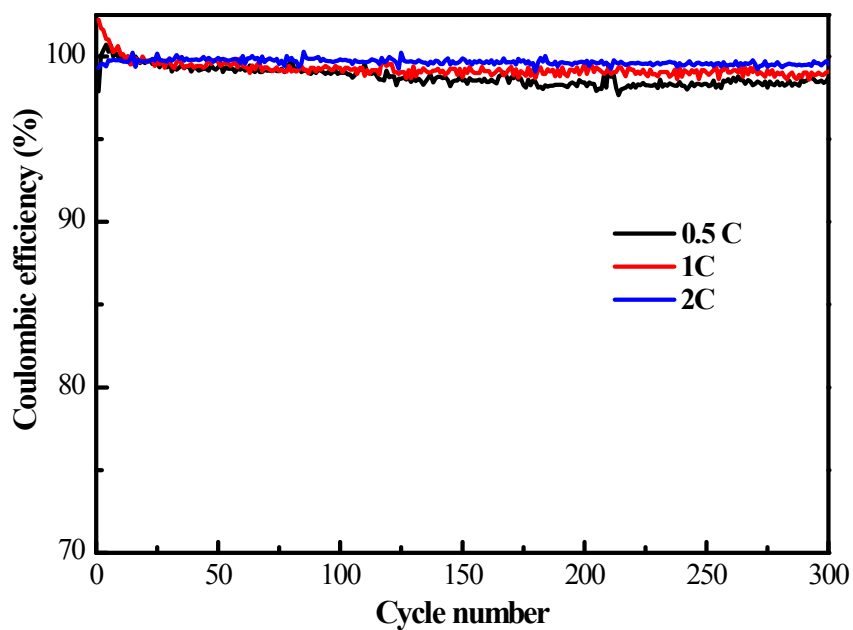

**Fig. S9** Coulombic efficiencies of g-C/S composite recorded during the processes of charging/discharging for 300 cycles at different rates.

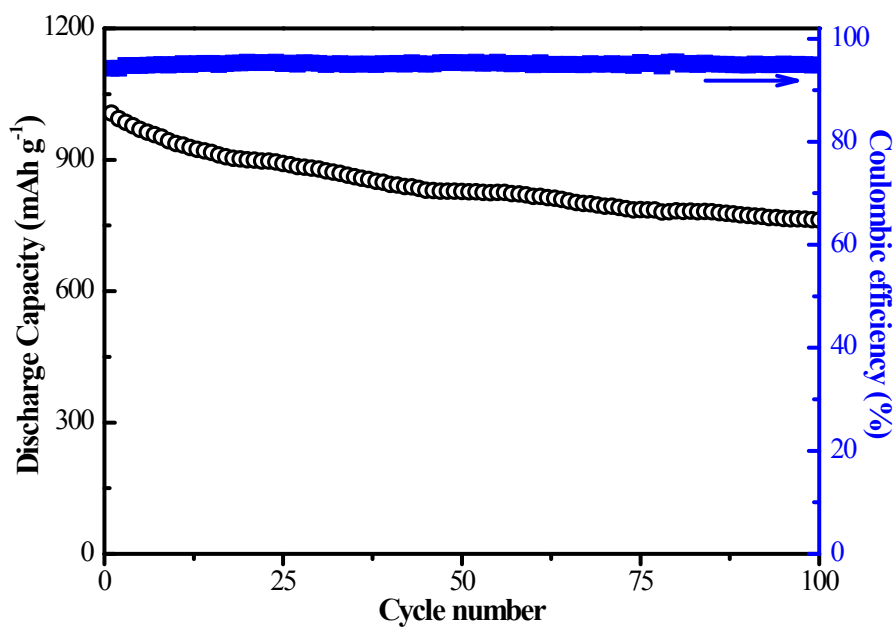

**Fig. S10** Cycling performance of the g-C/S composite electrode at a constant rate of 0.2 C without  $\text{LiNO}_3$  additive. The coulombic efficiency is also shown.

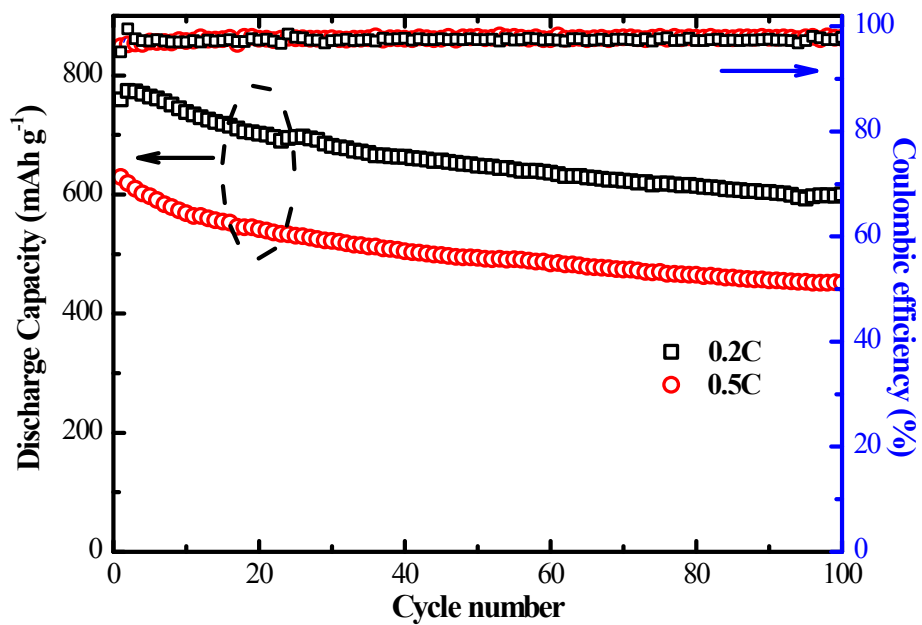

**Fig. S11** Cycling performance of the g-C/S composite electrode with a high sulfur loading of about  $5.5 \text{ mg cm}^{-2}$ . The coulombic efficiencies are also shown.
